# Supplementary material
Source: PubMed Central journal article supplement (PMC5617651)
Supplement: jci-127-93616-s001.pdf [file jci-127-93616-s001.pdf]

## Supplemental Figure Legends

### Figure S1. ER-targeting liposome treatment is able to modify the abundance of specific PC species in hepatocytes.

A-B) Content of PC species with 20:4 (A) and 18:0 (B) at sn-2 position (X/20:4 and X/18:0 PC) in microsomes isolated from WT primary hepatocytes treated with indicated ER targeting liposome ((30  $\mu$ M total phospholipid concentration) for 3.5 h. The abundance of the major PC species in microsomes were shown on the right. Statistical analysis was by Student's t test.

### Figure S2. The effect of Lpcat3 inhibition on Srebp1 processing is lost in the setting of Brefeldin-A treatment.

Primary hepatocytes were harvested from *Lpcat3*<sup>F/F</sup> mice as described and treated with GFP or CRE-expressing adenovirus at an MOI of 10. All of the cells also received LXR ligand (GW3965 1  $\mu$ M). After 24 h, cells were treated with brefeldin A at 2  $\mu$ g/ml for 5 h. Membrane and nuclear Srebp-1 were analyzed by western blotting and quantified by imageJ. The ratio of mSrebp-1 to pSrebp-1 was calculated and normalized to GFP-treated control in each treatment group.

### Figure S3. Regioisomer analysis of major PC species in the ER fraction from livers.

Regioisomer analysis of major PC species in the ER fraction from livers of C57BL/6 mice fasted 12 h or fasted 12 h and refed 12 h with high-fat diet (60% fat) were performed as described in the method. The ratio of ion intensity for the loss of the fatty acyl chain from the sn-1 position versus the sn-2 position were calculated.

### Figure S4. Regulation of ER phospholipid acyl chain composition during feeding.

A) ESI-MS/MS analysis of PE species in the ER fraction from livers of C57BL/6 mice fasted 12 h or fasted 12 h and refed 12 h with high carbohydrate diet.

B) ESI-MS/MS analysis of PC species in the ER fraction from livers of L-*Lpcat3*<sup>-/-</sup> mice fasted 12 h or fasted 12 h and refed 12 h with high carbohydrate diet.

Statistical analysis was by Student's t test with correction for multiple comparisons using the Holm-Sidak method (A,B). \*  $p < 0.05$ ; NS, not significant. Values are means  $\pm$  SEM.

**Figure S5. Regulation of ER phospholipid acyl chain composition in obesity.**

ESI-MS/MS analysis of PE species in the ER fraction from C57BL/6 and *ob/ob* mouse liver. n = 6 per group. Statistical analysis was by Student's t test with correction for multiple comparisons using the Holm-Sidak method. Values are means  $\pm$  SEM.

**A**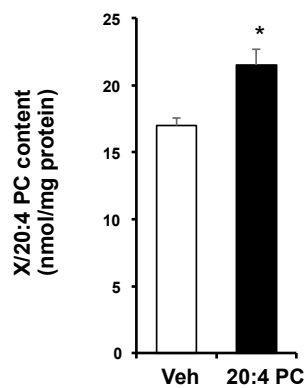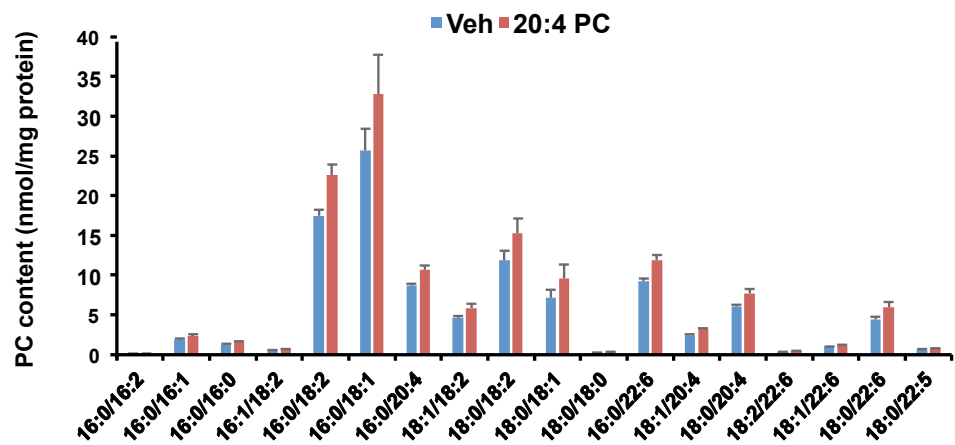**B**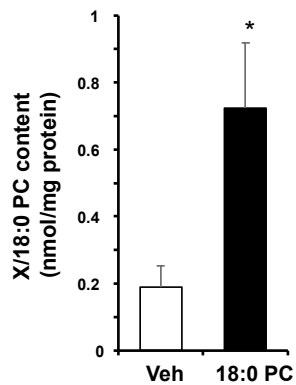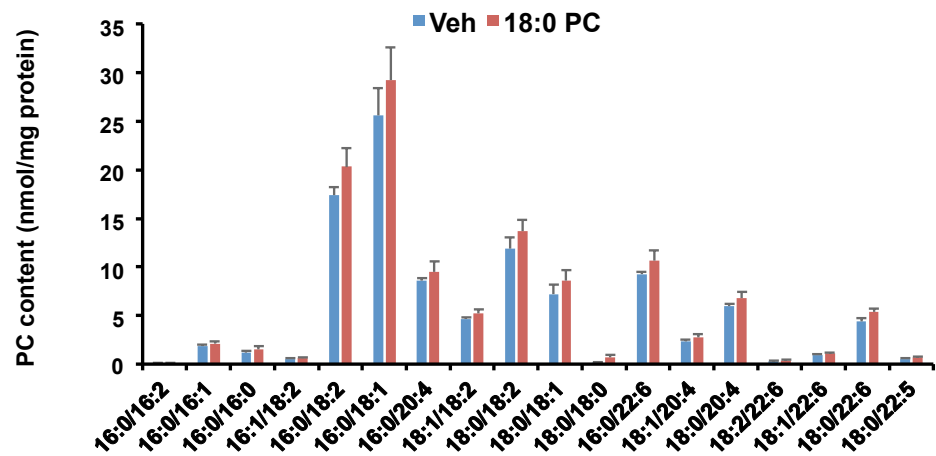

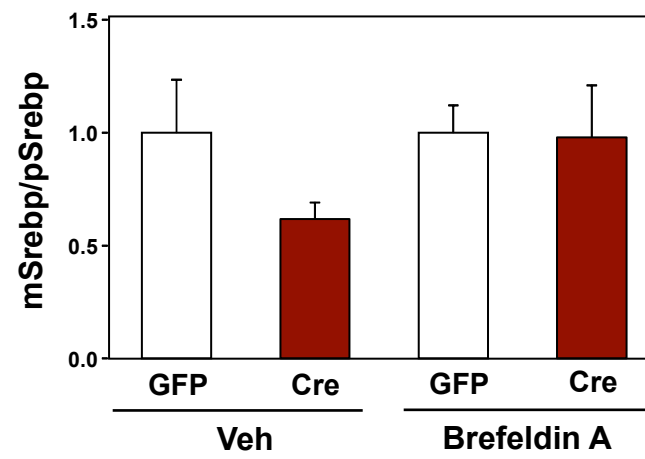

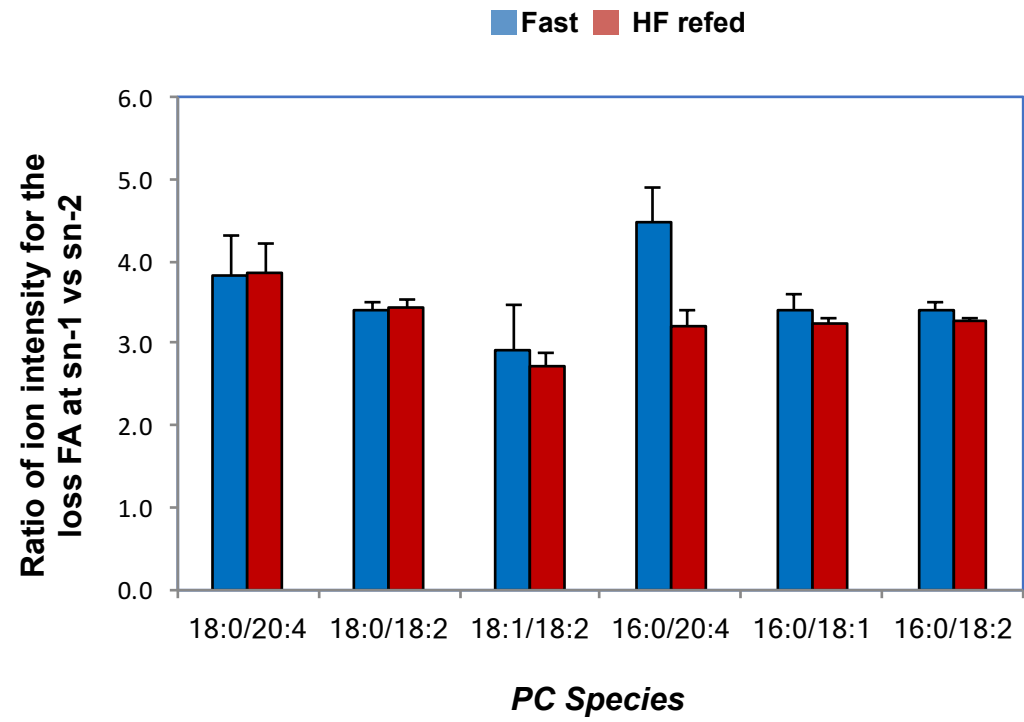

Rong Fig. S3

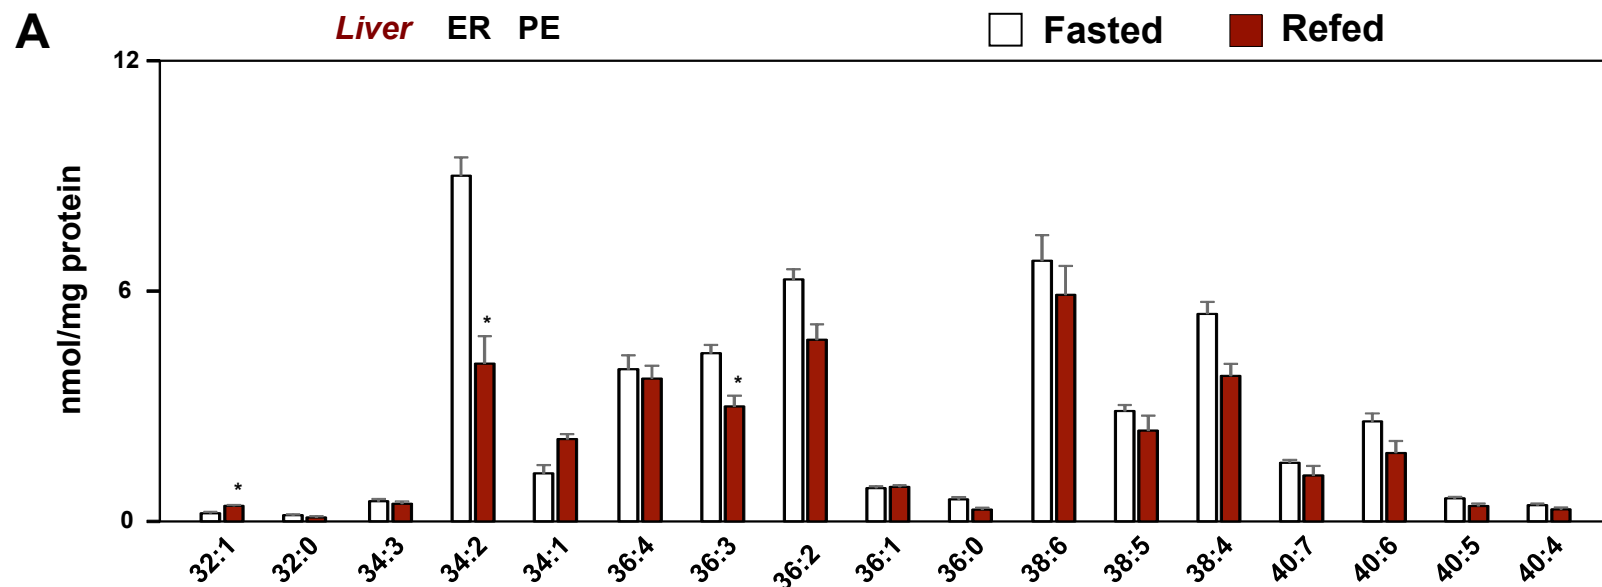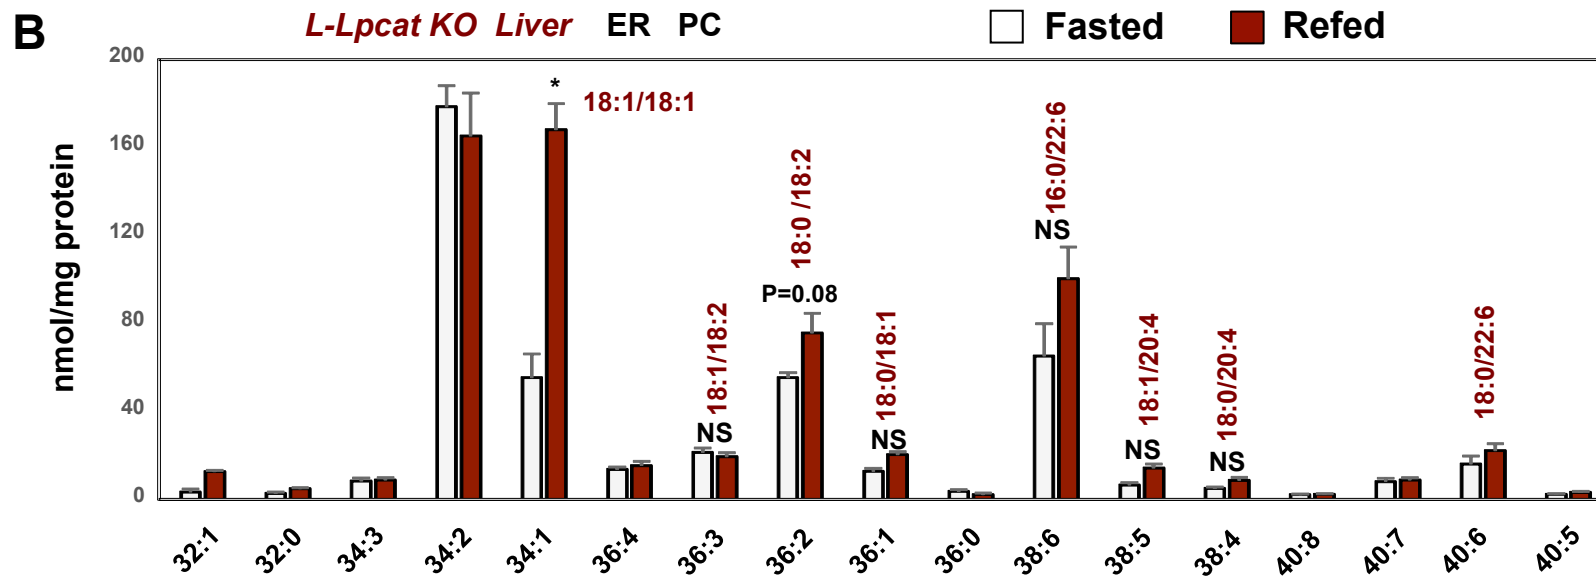

Rong Fig. S4

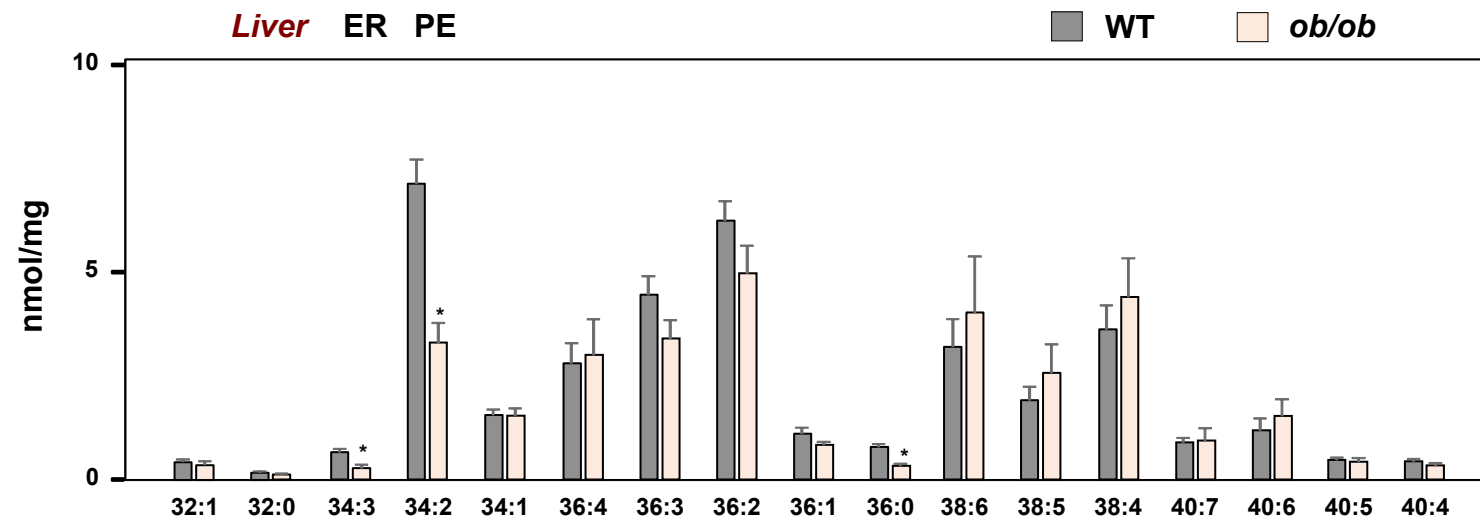

Rong Fig. S5
